# Supplementary material for: Polymorphism observed in dapsone–flavone cocrystals that present pronounced differences in solubility and stability
Source: Royal Society of Chemistry journal article supplement (doi:10.1039/c5ce01208b), 2015-01-01
Supplement: c5ce01208b1.pdf [file c5ce01208b1.pdf]

*Supplementary Information for*

**Polymorphism observed in dapstone-flavone cocrystals that present  
pronounced differences in solubility and stability**

Hongyan He, Linglei Jiang, Qi Zhang, Ying Huang, Jian-Rong Wang and Xuefeng Mei\*

*Pharmaceutical Analytical & Solid-State Chemistry Research Center, Shanghai  
Institute of Materia Medica, Chinese Academy of Sciences, Shanghai 201203, China*

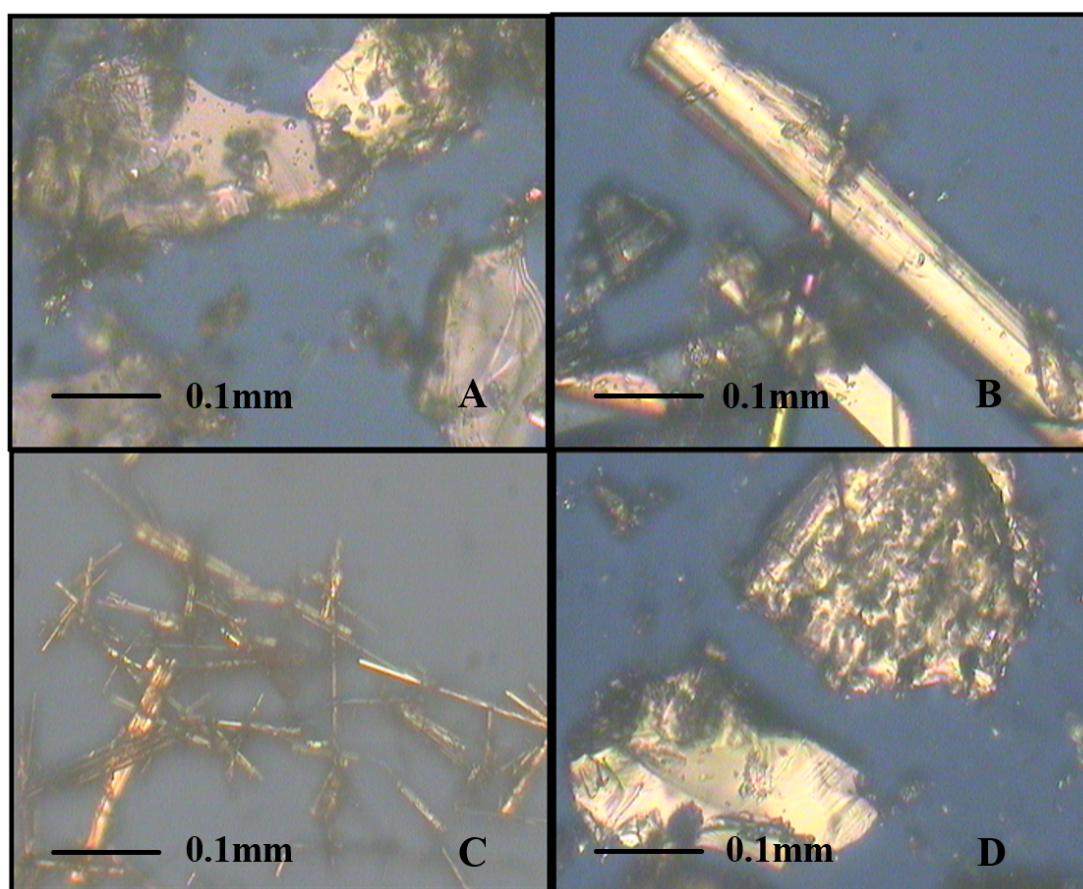

Figure S1. Polarized light microscopies for the cocrystal **A**, **B**, **C** and **D**

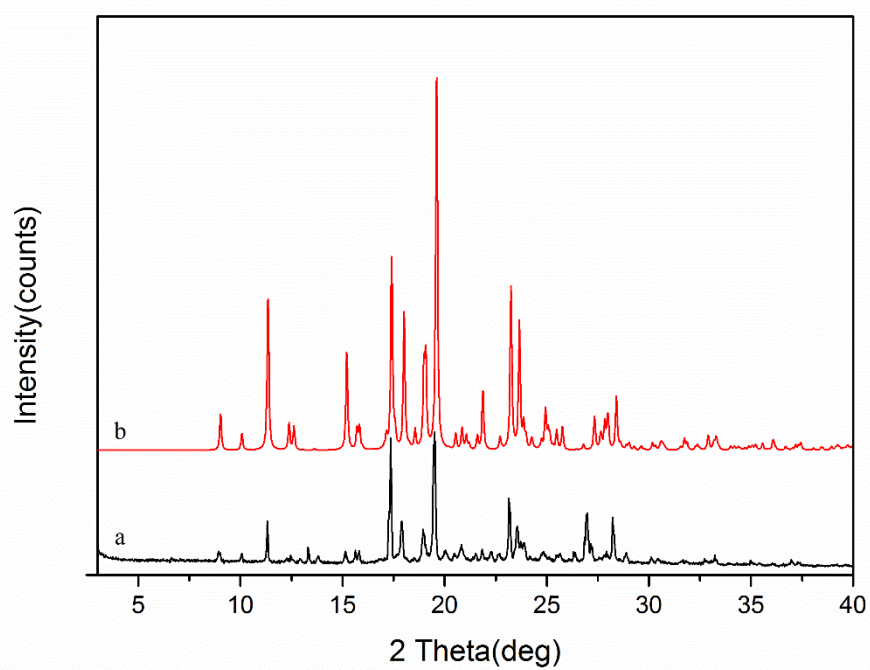

Figure S2. Powder X-ray diffraction of form **A** (a) experimental (b) simulated

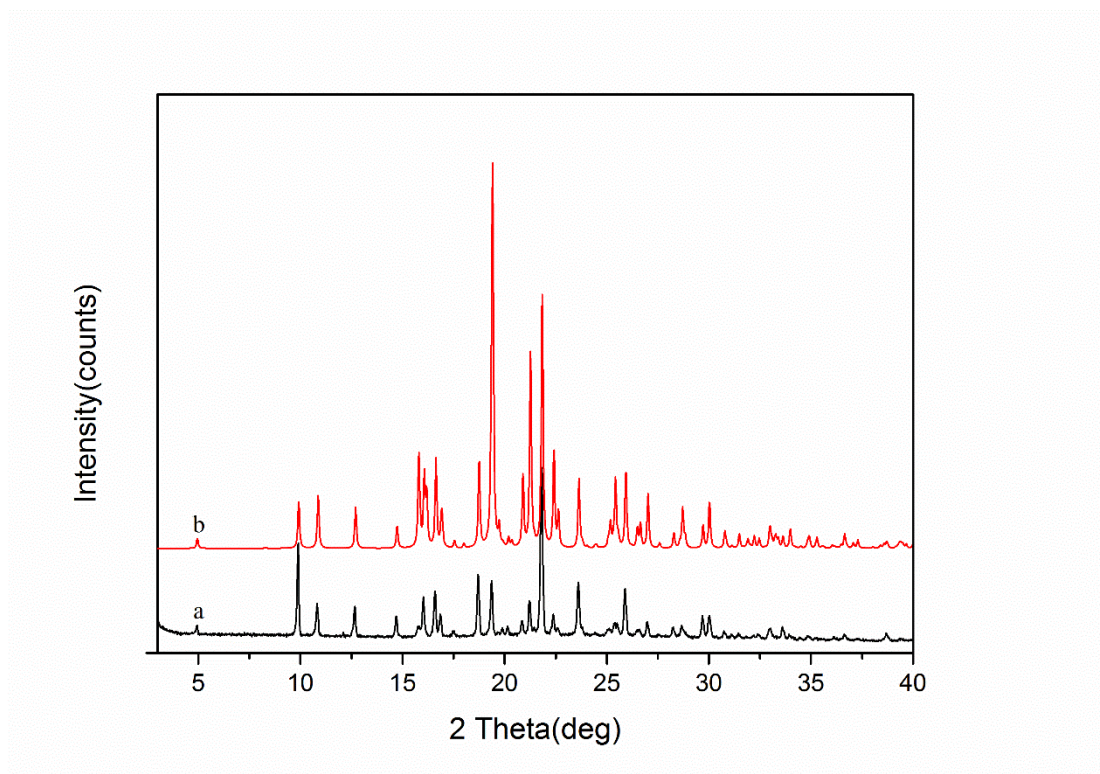

Figure S3. Powder X-ray diffraction of form **B** (a) experimental (b) simulated

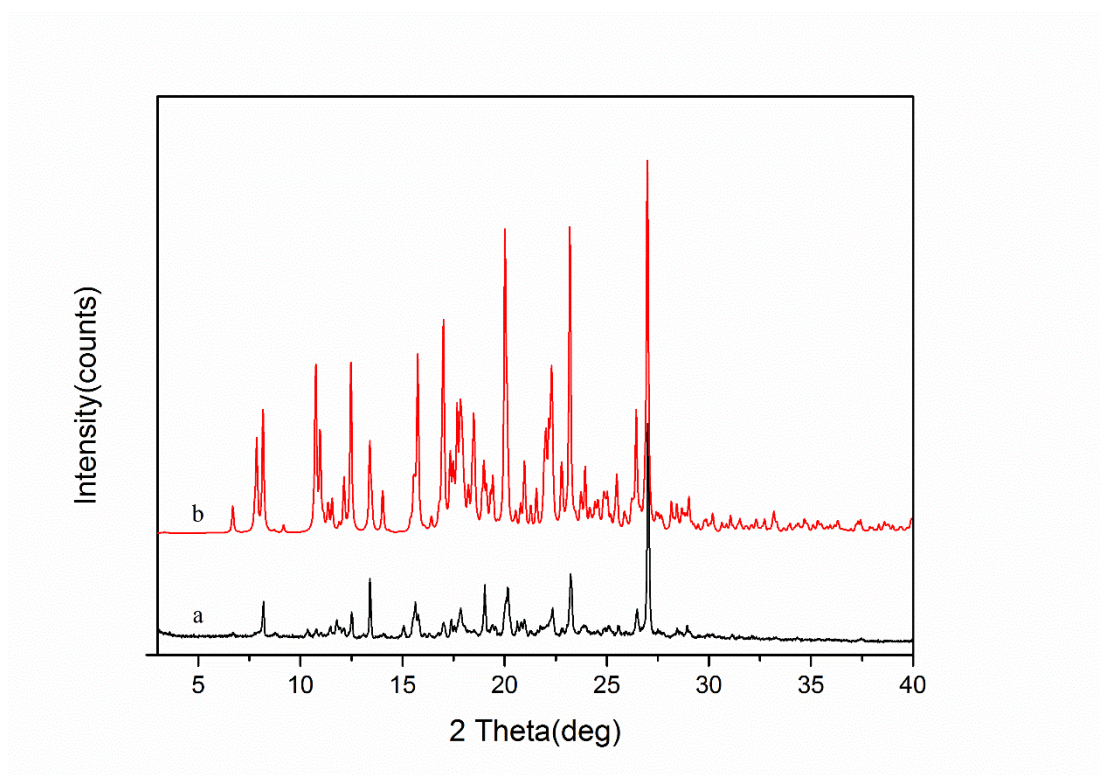

Figure S4. Powder X-ray diffraction of form **D** (a) experimental (b) simulated

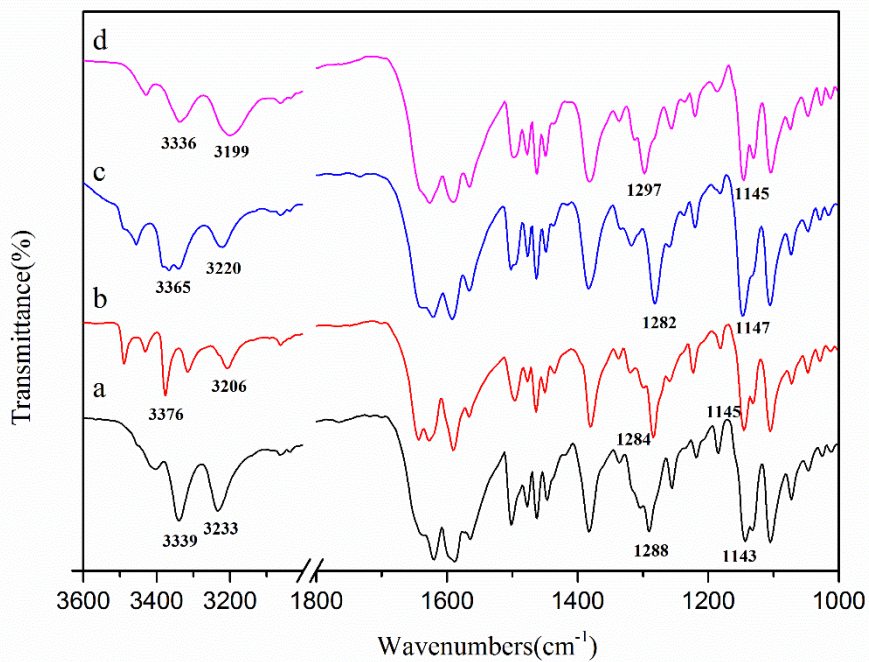

Figure S5. FT-IR spectra of cocystal (a) **A** (b) **B** (c) **C** and (d) **D**

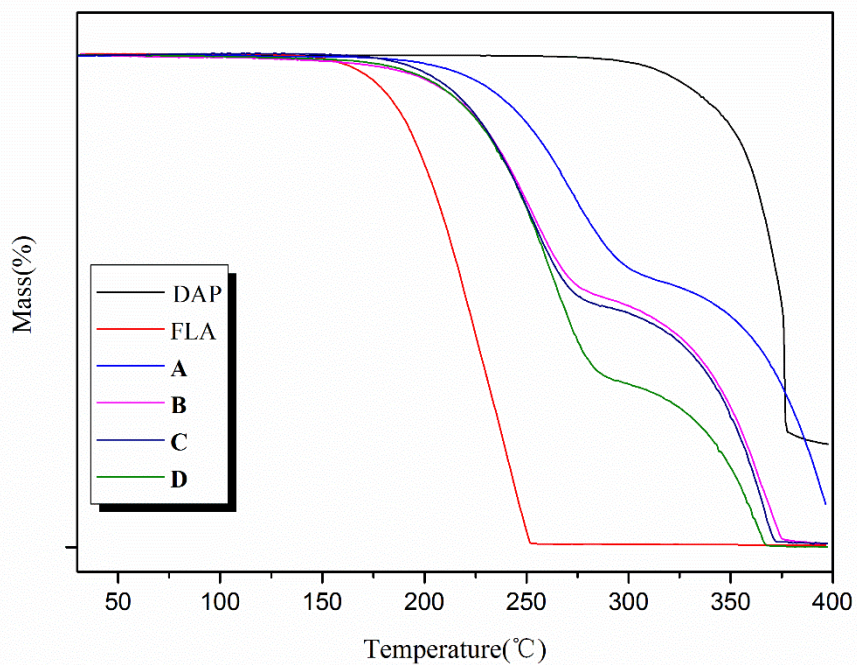

Figure S6. Comparison of TGA thermograms of DAP, FLA, **A**, **B**, **C** and **D**.

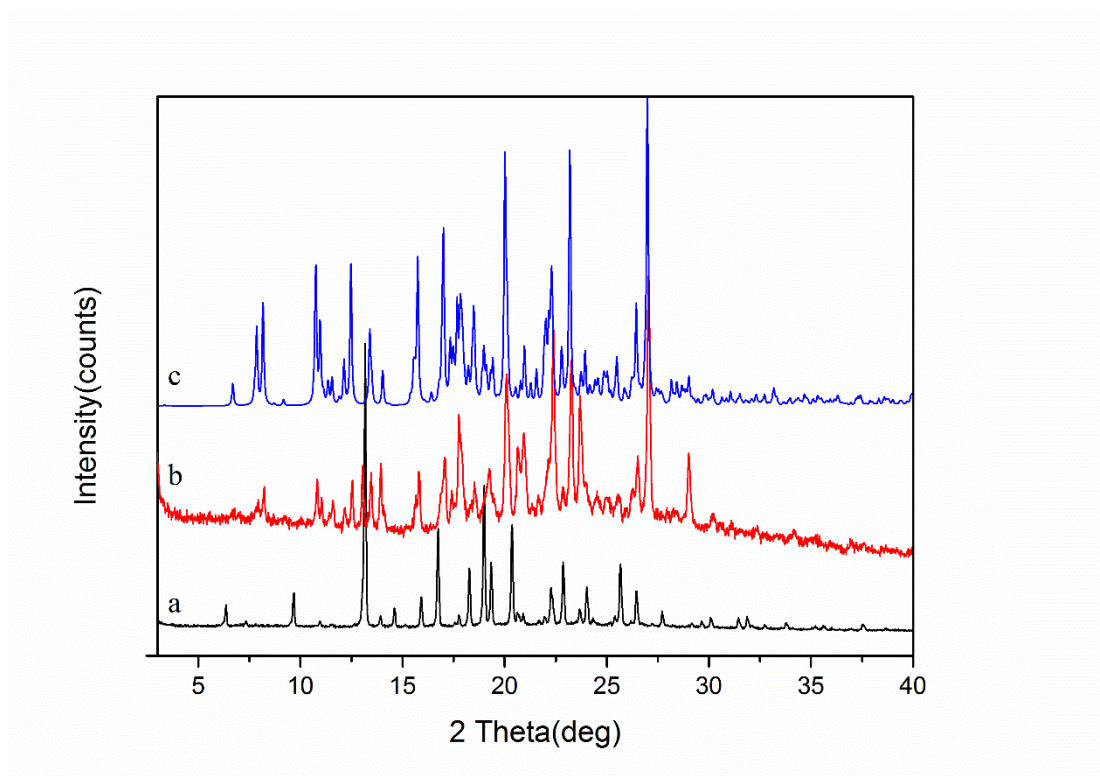

Figure S7. Comparison of PXRD patterns of (a) form **C** (b) form **C** heating for 2h at 90 °C (c) form **D** simulated

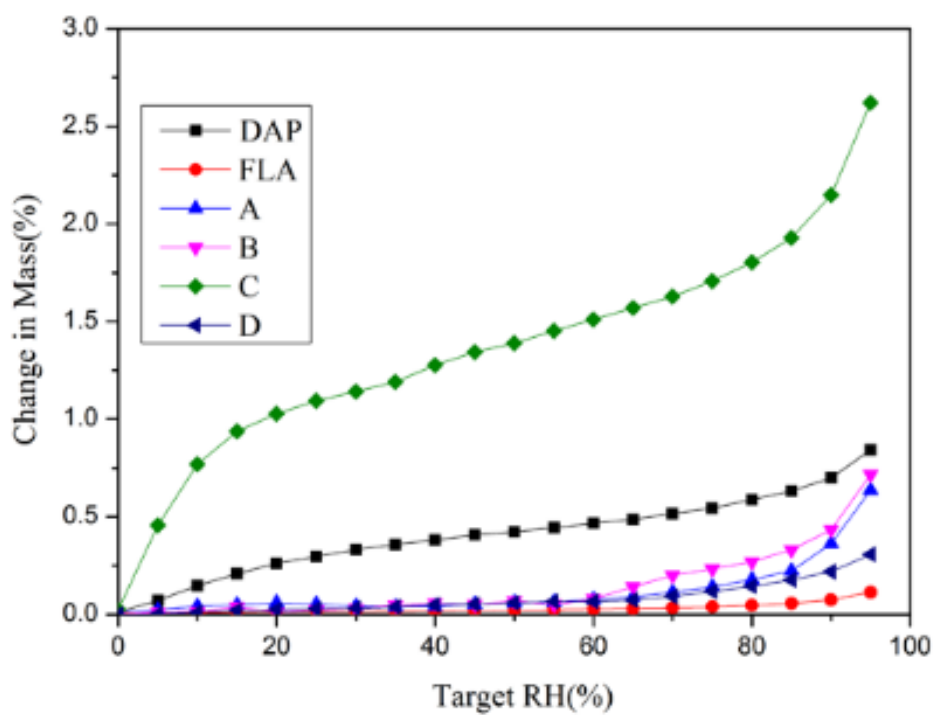

Figure S8. DVS diagrams of DAP, FLA, A, B, C and D

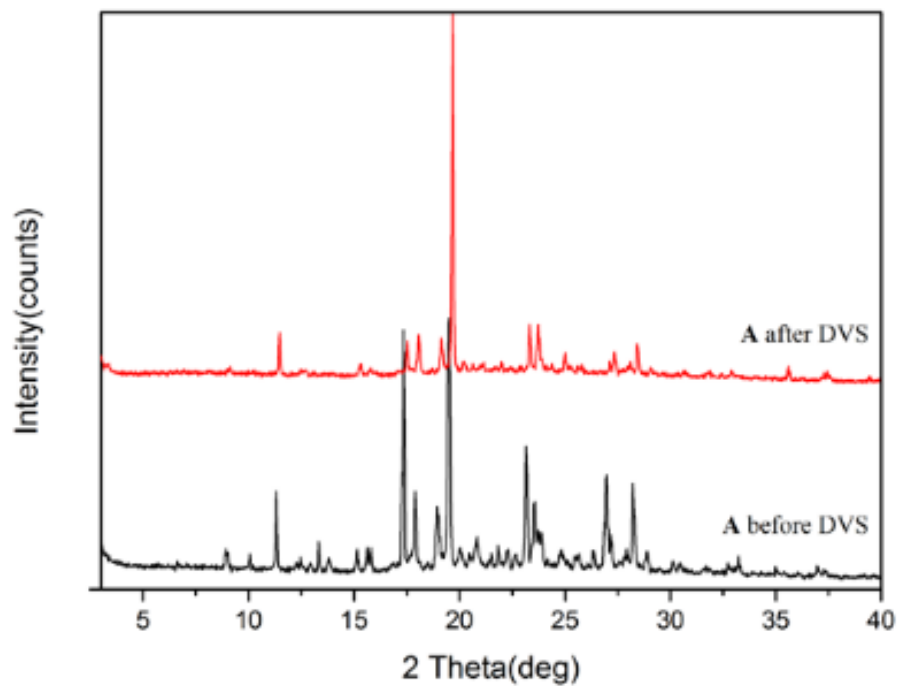

Figure S9. Comparison of PXR D patterns for form **A** before and after DVS.

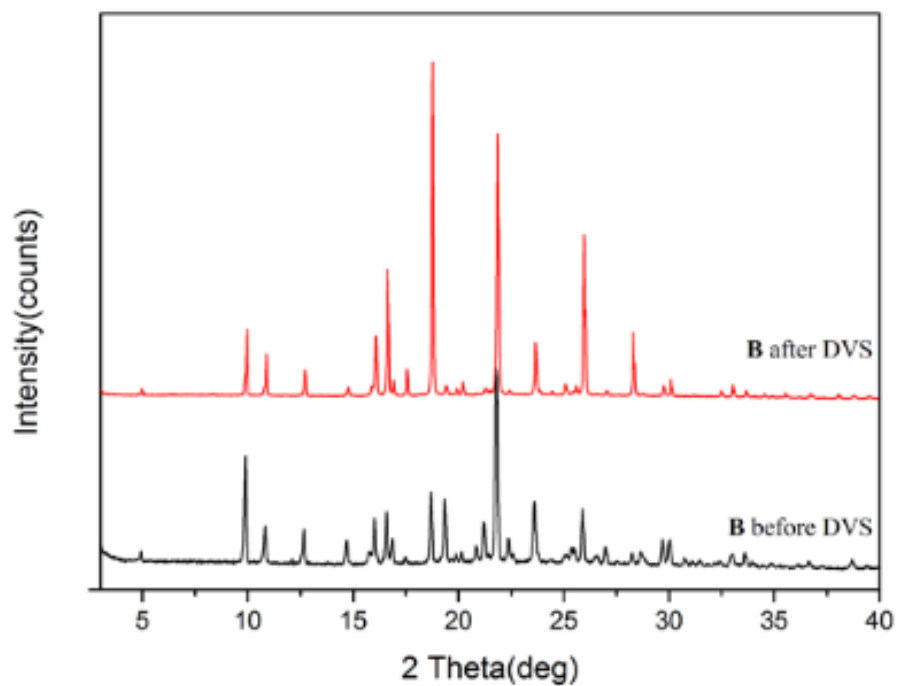

Figure S10. Comparison of PXR D patterns for form **B** before and after DVS.

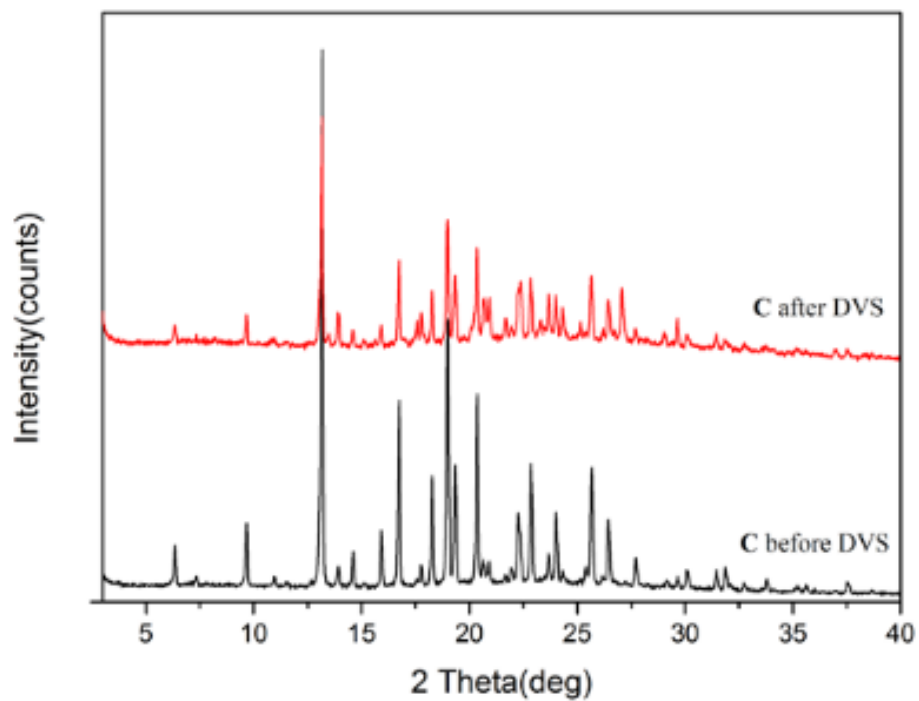

Figure S11. Comparison of PXR D patterns for form **C** before and after DVS.

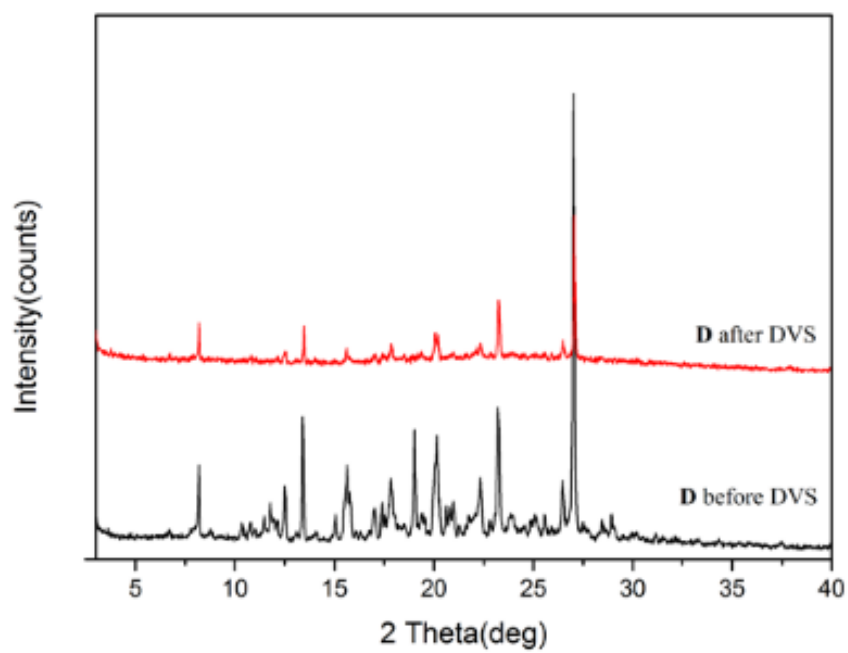

Figure S12. Comparison of PXR D patterns for form **D** before and after DVS.

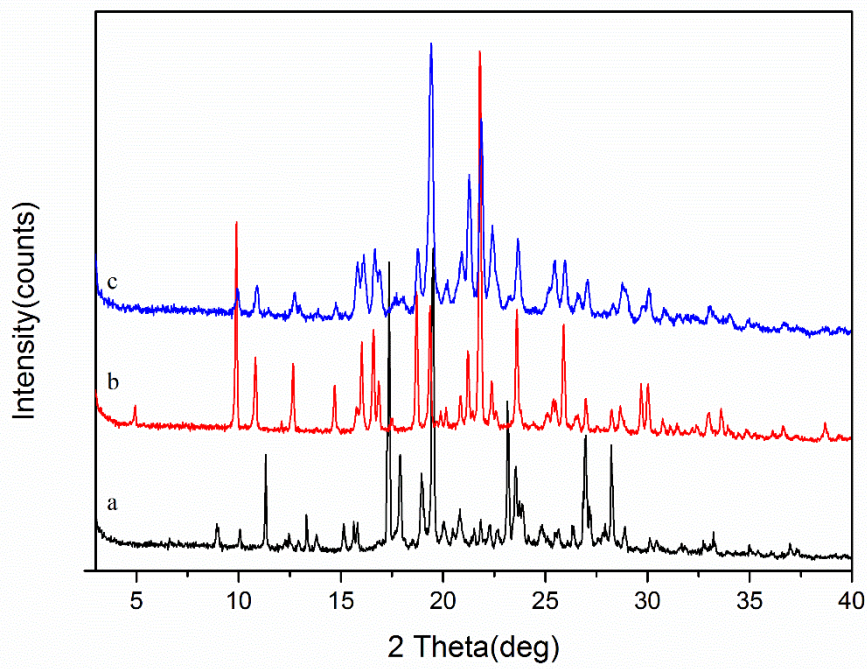

Figure S13. Comparison of PXRd patterns of (a) **A** (b) **B** (c) **A** and **B** slurry in hexane for 24 h

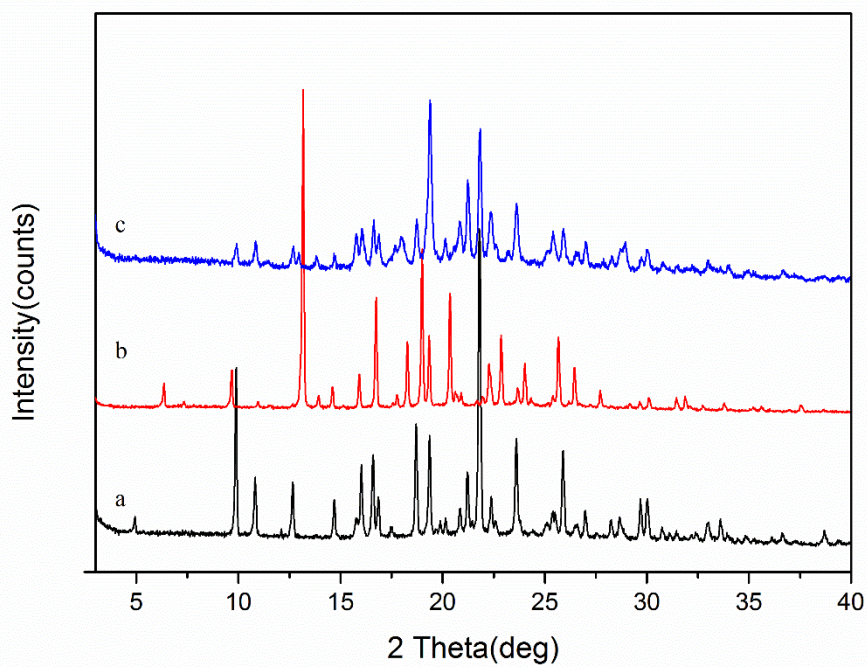

Figure S14. Comparison of PXRd patterns of (a) **B** (b) **C** (c) **B** and **C** slurry in hexane for 24 h



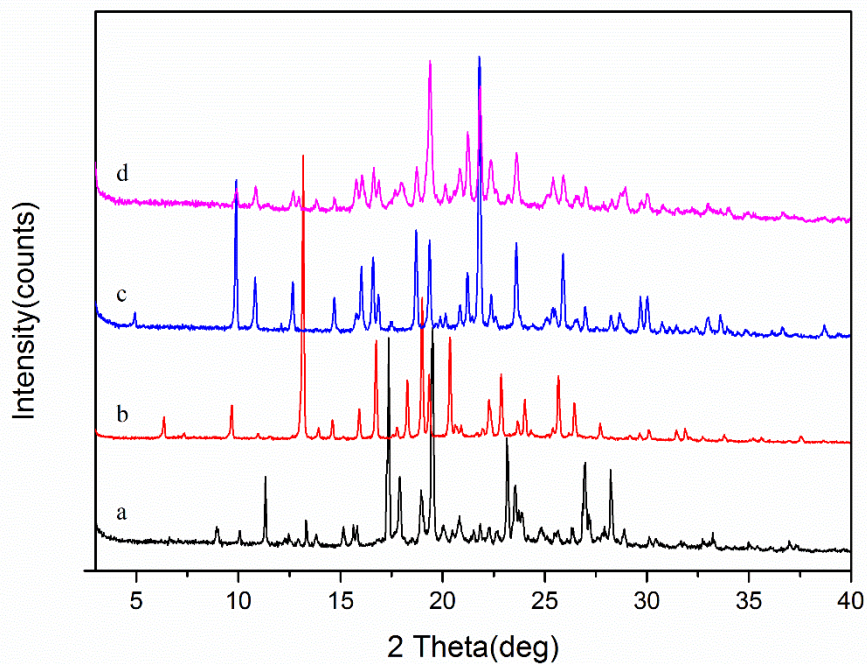

Figure S15. Comparison of PXR D patterns of (a) **A** (b) **C** (c) **B** (d) **A** and **C** slurry in hexane for 24 h

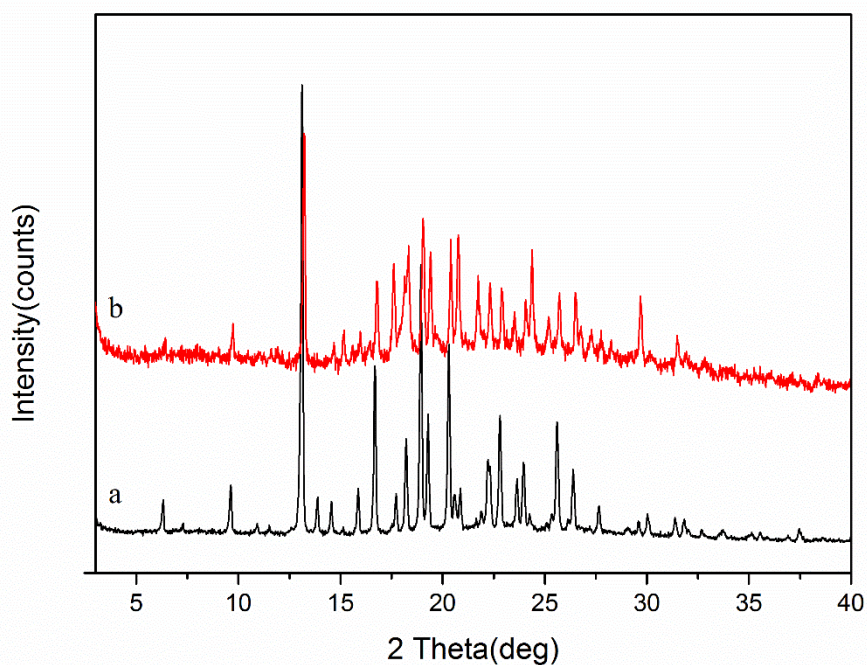

Figure S16. Comparison of PXR D patterns of (a) **C** (b) residual solid of **A** slurry in water

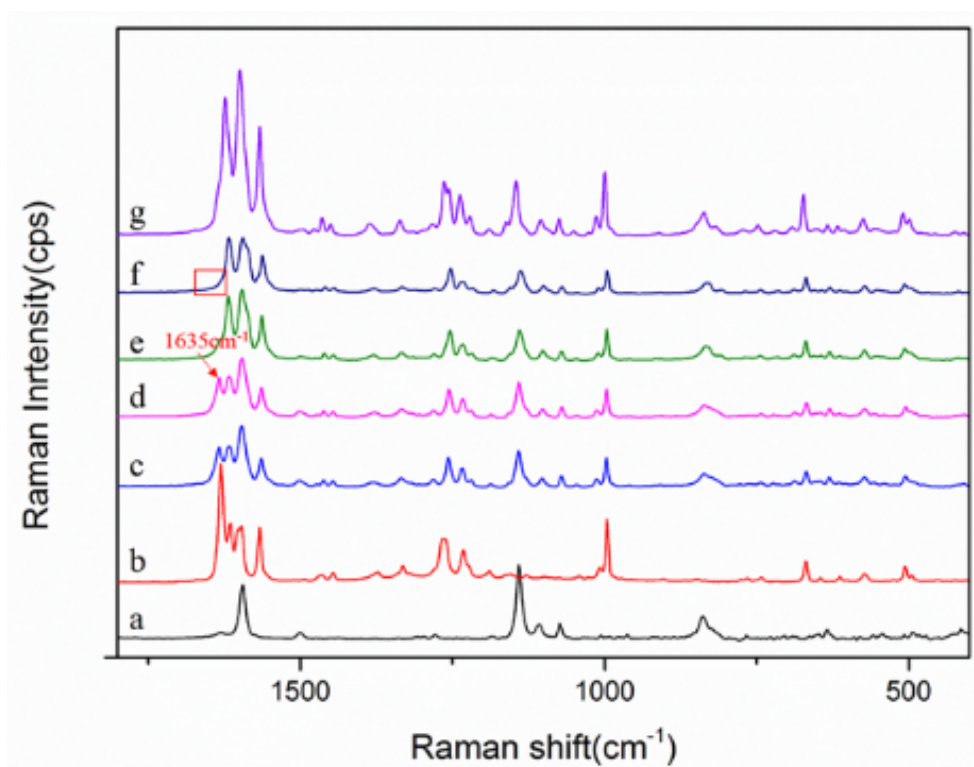

Figure S17. Comparison of Raman spectra for (a) DAP (b) FLA (c) **C** at 25 °C (d) **C** at 50 °C (e) **C** at 60 °C (f) **C** at 95 °C (g) **D** between 1800 to 400  $\text{cm}^{-1}$ .

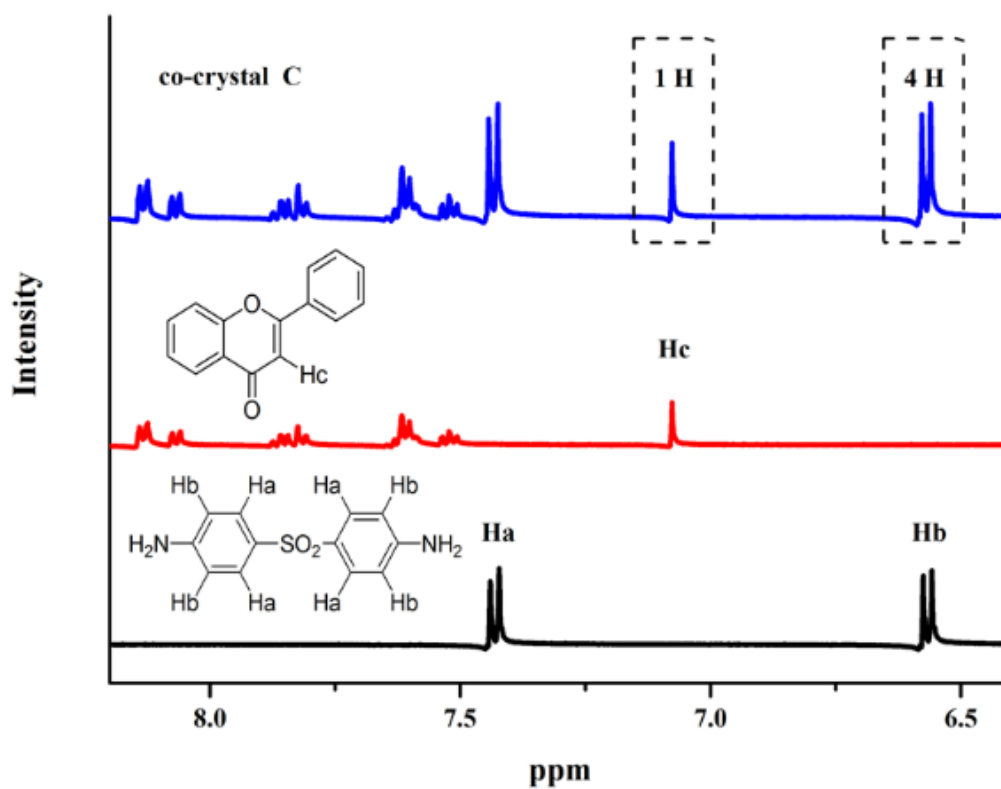

Figure S18. Comparison of  $^1\text{H-NMR}$  ( $d_6\text{-DMSO}$ , 400 MHz) patterns of **C**, DAP and FLA. The integration values suggested that the stoichiometry of DAP:FLA = 1:1.

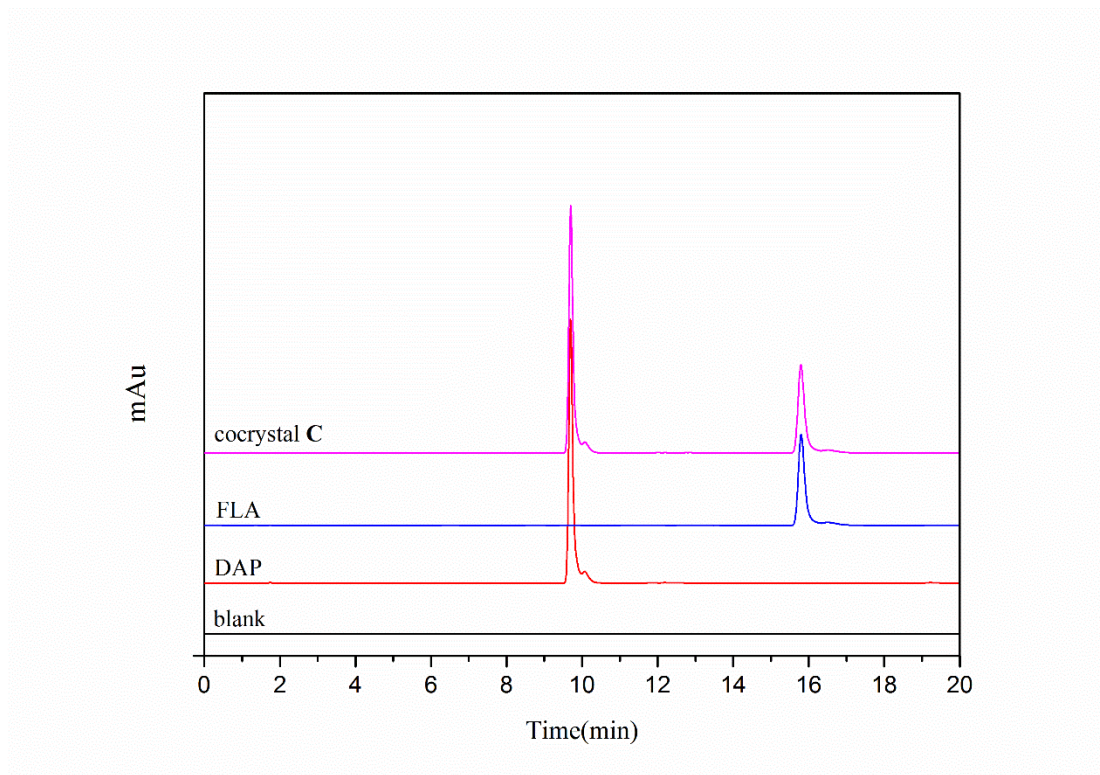

Figure S19. Comparison of HPLC analysis of DAP, FLA and cocystal **C**. The integration area suggested that the stoichiometry of DAP:FLA = 1:1.

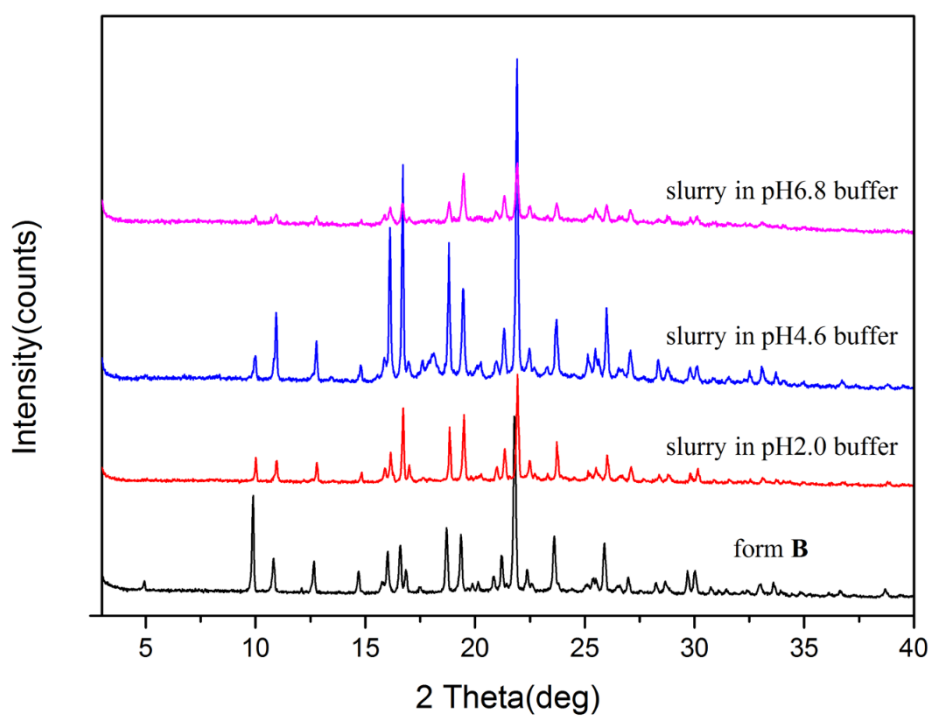

Figure S20. PXRD patterns for residual solids from **B** solubility experiments.

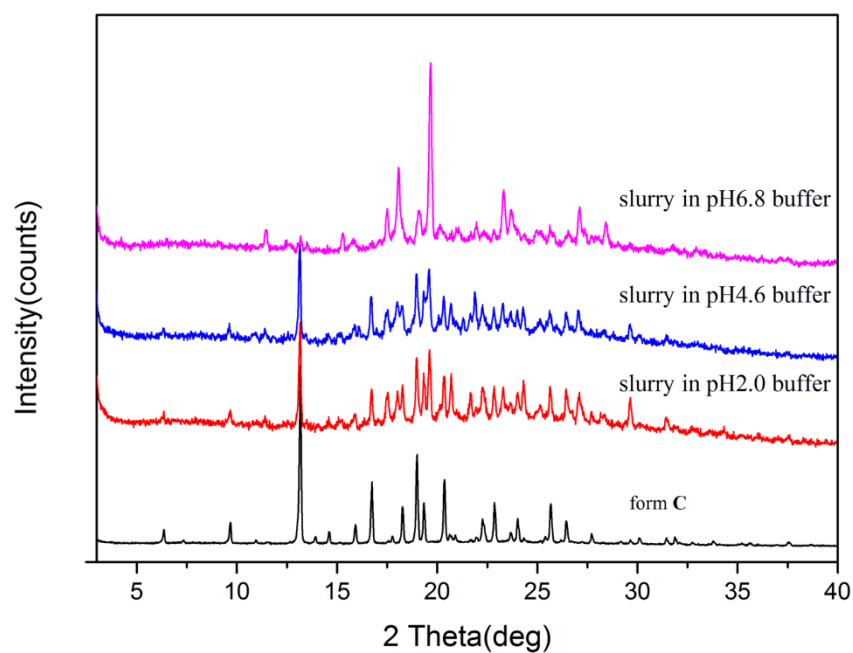

Figure S21. PXRD patterns for residual solids from **C** solubility experiments

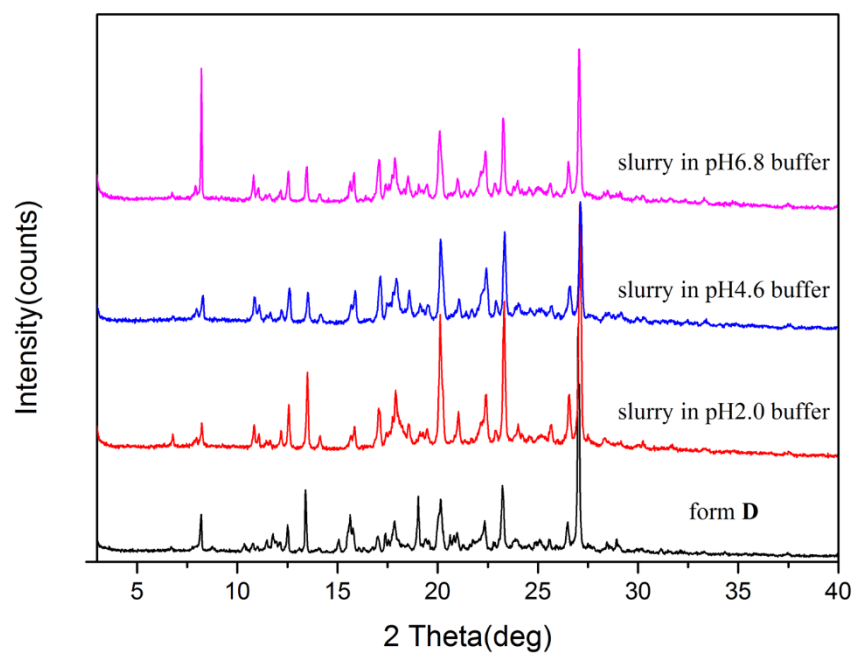

Figure S22. PXRD patterns for residual solids from **D** solubility experiments.

Table S1. Hydrogen bond data for the polymorphic cocrystals

| Forms | D-H...A | d(D-H),<br>Å | d(H...A),<br>Å | d(D...A),<br>Å | ∠(D-H...A),<br>deg | Symmetry code |
|-------|---------|--------------|----------------|----------------|--------------------|---------------|
|-------|---------|--------------|----------------|----------------|--------------------|---------------|

|          |              |      |      |          |     |                     |
|----------|--------------|------|------|----------|-----|---------------------|
| <b>A</b> | N1-H1A···N2  | 0.86 | 2.38 | 3.174(2) | 153 | x+1, y, z           |
|          | N1-H1B···O4  | 0.86 | 2.21 | 2.957(6) | 146 | x+1/2,-y+3/2,z-1/2  |
|          | N2-H2A···O1  | 0.86 | 2.16 | 2.969(3) | 156 | -x+1/2,y-1/2,-z+1/2 |
|          | N2-H2B···O4  | 0.86 | 2.11 | 2.918(3) | 157 | -x+1/2,y-1/2,-z+1/2 |
| <b>B</b> | N1-H1B···O4  | 0.86 | 2.13 | 2.971(9) | 164 | -x+1/2,-y+2,z+3/2   |
|          | N2-H2B···O1  | 0.86 | 2.30 | 3.146(8) | 166 | x+1/4,-y+7/4,z-1/4  |
| <b>D</b> | N3-H3B···N4  | 0.86 | 2.36 | 3.102(3) | 145 | x-1,y,z             |
|          | N4-H4A···O10 | 0.86 | 2.03 | 2.821(3) | 153 | x+1,y-1,z           |
|          | N4-H4B···O12 | 0.86 | 2.11 | 2.942(3) | 163 | x+1,y-1,z           |
|          | N1-H1A···O6  | 0.86 | 2.19 | 2.990(3) | 153 | x-1,y,z             |
|          | N1-H1B···O8  | 0.86 | 2.29 | 2.979(3) | 137 | x-1,y,z             |
|          | N2-H2A···N1  | 0.86 | 2.25 | 3.082(3) | 165 | x+1,y,z             |
|          | N2-H2B···O4  | 0.86 | 2.20 | 3.055(3) | 173 |                     |

Table S2. Summary of Equilibrium Solubility of DAP, FLA and DAP-FLA cocrystals

| Material | Equilibrium solubility (mg/ml) |        |        | Residue after equilibrium |
|----------|--------------------------------|--------|--------|---------------------------|
|          | pH 2.0                         | pH 4.6 | pH 6.8 |                           |
| DAP      | 0.40*                          | 0.17*  | 0.17*  | DAP hydrate               |
| <b>A</b> | 0.47*                          | 0.20*  | 0.18*  | <b>C</b>                  |
| <b>B</b> | 0.33                           | 0.17   | 0.17   | <b>B</b>                  |
| <b>C</b> | 0.38                           | 0.19   | 0.15   | <b>C</b>                  |
| <b>D</b> | 0.10                           | 0.07   | 0.09   | <b>D</b>                  |

\*Note: Value are corresponding to the equilibrium solubility of the residue solids.

Table S3. Summary of Intrinsic Dissolution Rates of DAP, FLA and DAP-FLA cocrystals

| Material | IDR(ug/min · cm <sup>2</sup> ) |
|----------|--------------------------------|
|          |                                |

---

|            | pH 2.0 | pH 4.6 | pH 6.8 |
|------------|--------|--------|--------|
| <b>DAP</b> | 98.9   | 44.9   | 31.1   |
| <b>A</b>   | 46.6   | 35.6   | 19.8   |
| <b>B</b>   | 15.5   | 10.0   | 8.7    |
| <b>C</b>   | 12.9   | 9.2    | 2.4    |
| <b>D</b>   | 8.0    | 8.1    | 5.1    |

---
